# Supplementary material for: A novel paper-based colorimetry device for the determination of the albumin to creatinine ratio
Source: Royal Society of Chemistry journal article supplement (doi:10.1039/c8an01122b), 2018-01-01
Supplement: c8an01122b1.pdf [file c8an01122b1.pdf]

## Supplementary Information

### A Novel Paper-based Colorimetry Device for the Determination of the Albumin to Creatinine Ratio

Sudkate Chaiyo<sup>a</sup>, Kurt Kalcher<sup>b</sup>, Amara Apilux<sup>c</sup>, Orawon Chailapakul<sup>a</sup>, Weena Siangproh<sup>d\*</sup>

<sup>a</sup> *Electrochemistry and Optical Spectroscopy Center of Excellence (EOSCE), Department of Chemistry, Faculty of Science, Chulalongkorn University, 254 Phayathai Road, Patumwan, Bangkok 10330, Thailand*

<sup>b</sup> *Institute of Chemistry, Department of Analytical Chemistry, Karl-Franzens University, Universitätsplatz 1, Graz A-8010, Austria*

<sup>c</sup> *Center for research and innovation, Faculty of Medical Technology, Mahidol University, 999 Phuttamonthon 4 Road, Salaya, Nakhon Pathom 73170, Thailand*

<sup>d</sup> *Department of Chemistry, Faculty of Science, Srinakharinwirot University, Sukhumvit 23, Wattana, Bangkok 10110, Thailand*

*\*Corresponding author:* Assoc. Prof. Dr. Weena Siangproh

*E-mail addresses:* weena@g.swu.ac.th; Tel.: +662 640 5000 ext 18208; Fax: +66 2 259 2091

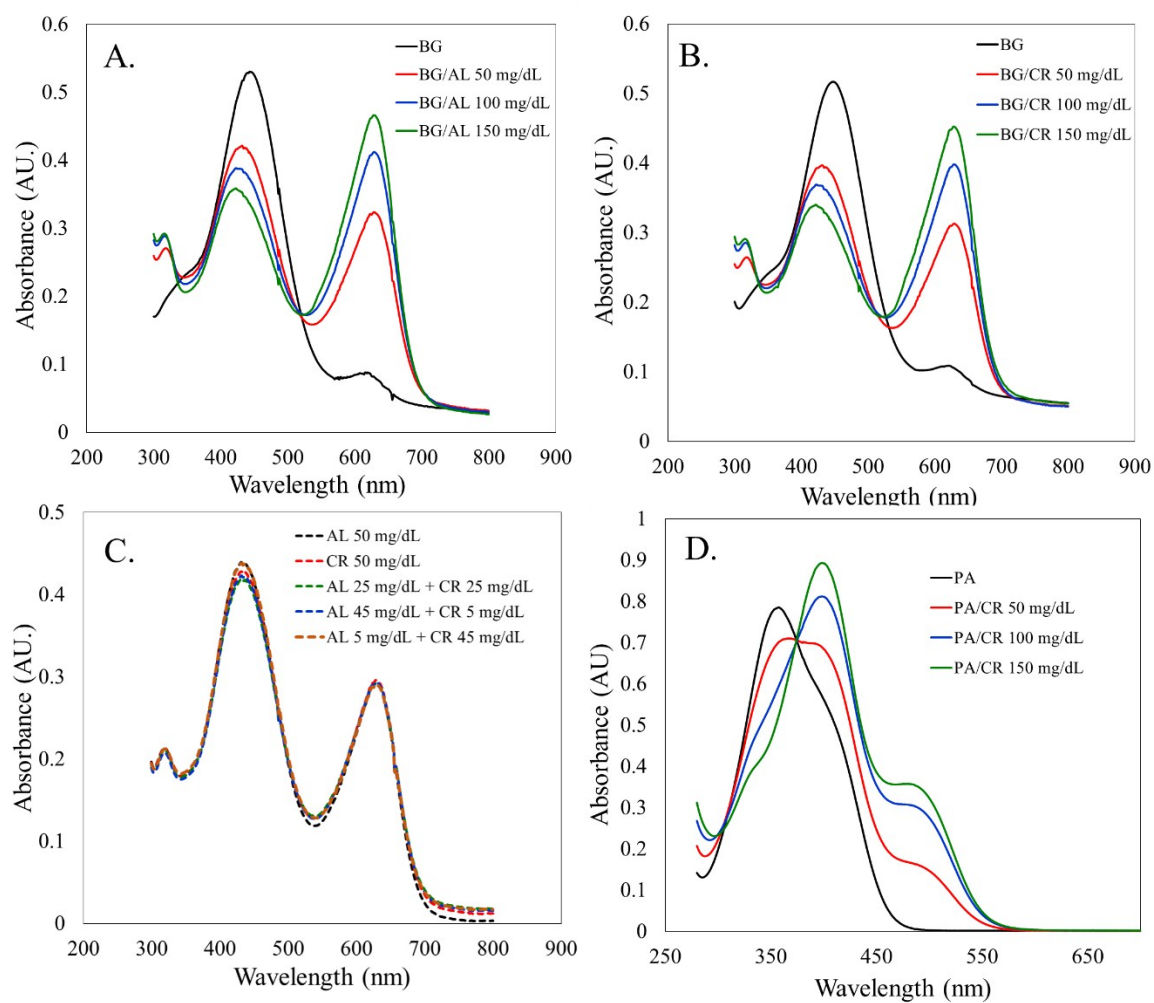

**Figure S1** UV-vis spectra of the BG in PBS solution at pH 4 in with/without of AL (A), the BG in PBS solution at pH 4 in with/without of CR (B), the BG in PBS solution at pH 4 with AL, CR and AL+CR (C), and the PA in NaOH solution with/without of CR (D).

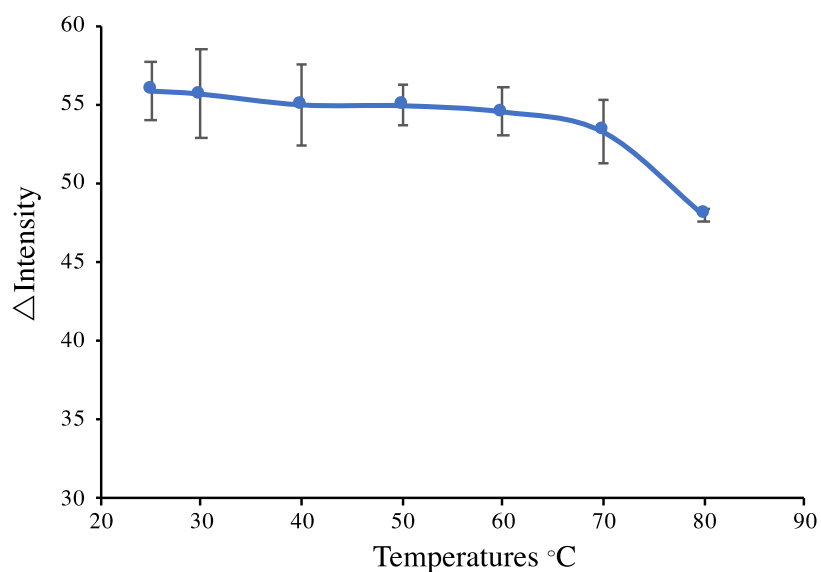

**Figure S2** The mean color intensity values on PADs for determination of AL using BG dye at difference time and temperature.

**Table S1** Comparisons of two measurement methods for determination of ACR in urinary samples (n=3)

| Sample  | Albumin to Creatinine ratio ( $\mu\text{g mg}^{-1}$ ) |                  |
|---------|-------------------------------------------------------|------------------|
|         | Proposed method                                       | Standard method* |
| Urine 1 | $20.16 \pm 2.2$                                       | $19.59 \pm 1.2$  |
| Urine 2 | $26.84 \pm 3.2$                                       | $22.76 \pm 2.5$  |
| Urine 3 | $26.81 \pm 2.4$                                       | $23.31 \pm 1.7$  |

\* UV-Visible spectrophotometry
